# Supplementary material for: Human Breast Tissue Microbiota Reveals Unique Microbial Signatures that Correlate with Prognostic Features in Adult Ethiopian Women with Breast Cancer
Source: MDPI journal article supplement (doi:10.3390/cancers15194893), 2023-10-09
Supplement: s1 [file s1]

# Human breast tissue microbiota reveals unique microbial signatures that correlate with prognostic features in adult Ethiopian women with breast cancer

Zelalem Desalegn<sup>1,2</sup>, Alana Smith<sup>3</sup>, Meron Yohannes<sup>1,2,4</sup>, Xueyuan Cao<sup>5</sup>, Endale Anberber<sup>6</sup>, Yonas Bekurestion<sup>7</sup>, Matewos Assefa<sup>8</sup>, Marcus Bauer<sup>9</sup>, Martina Vetter<sup>10</sup>, Eva Johanna Kantelhardt<sup>2,10,11</sup>, Tamrat Abebe<sup>1,2\*±</sup>, and Athena Starlard-Davenport<sup>3\*±</sup>

**Citation:** To be added by editorial staff during production.

Academic Editor: Firstname  
Lastname

Received: date  
Revised: date  
Accepted: date  
Published: date

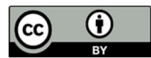

**Copyright:** © 2023 by the authors. Submitted for possible open access publication under the terms and conditions of the Creative Commons Attribution (CC BY) license (<https://creativecommons.org/licenses/by/4.0/>).

<sup>1</sup> Department of Microbiology, Immunology, and Parasitology, School of Medicine, Addis Ababa University, Addis Ababa 9086, Ethiopia; zelalem.desalegn@aaau.edu.et; tzollove@gmail.com

<sup>2</sup> Global Health Working Group, Martin Luther University Halle-Wittenberg, Halle (Saale) 06097, Germany

<sup>3</sup> Department of Genetics, Genomics and Informatics, College of Medicine, University of Tennessee Health Science Center, Memphis, TN 38163, USA; astarlar@uthsc.edu; aantoin1@uthsc.edu

<sup>4</sup> School of Medical Laboratory Sciences, Addis Ababa University, Addis Ababa 9086, Ethiopia; meritijo@gmail.com; meron.yohannes@aaau.edu.et

<sup>5</sup> Department of Health Promotion and Disease Prevention, College of Nursing, University of Tennessee Health Science Center, Memphis, TN 38163, USA; xcao12@uthsc.edu

<sup>6</sup> School of Medicine, Department of Surgery, Addis Ababa University, Addis Ababa 9086, Ethiopia; endale.anberber@gmail.com

<sup>7</sup> School of Medicine, Department of Pathology, Addis Ababa University, Addis Ababa 9086, Ethiopia; yonasbtsion@yahoo.com; yonas.bekurestion@aaau.edu.et

<sup>8</sup> School of Medicine, Department of Oncology, Addis Ababa University, Addis Ababa 9086, Ethiopia; mathewosassefa80@hotmail.com

<sup>9</sup> Institute of Pathology, Martin Luther University Halle-Wittenberg, Halle (Saale) 06097, Germany; marcus.bauer@uk-halle.de

<sup>10</sup> Department of Gynecology, Martin Luther University Halle-Wittenberg, Halle (Saale) 06097, Germany; eva.kantelhardt@uk-halle.de

<sup>11</sup> Institute of Medical Epidemiology, Biostatistics, and Informatics, Martin Luther University Halle-Wittenberg, Halle (Saale) 06097, Germany; eva.kantelhardt@uk-halle.de

\* Correspondence: astarlar@uthsc.edu; Tel.: +1 901-448-3085; tamrat.abebe@aaau.edu.et; Tel.: +251911447227

±These authors contributed equally to this work

### *Supplemental Tables and Figures*

**Table S1: Significant genera by paired Wilcoxon signed-rank in paired tumor relative to normal adjacent tumor tissues**

| <b>Genus</b>    | <b>MedianIQR</b>       | <b>P-value</b> | <b>BH95</b> |
|-----------------|------------------------|----------------|-------------|
| Sphingobium     | -0.347 (-2.134, 0)     | 0.0001         | 0.0105      |
| Anaerococcus    | -0.159 (-1.475, 0)     | 0.0001         | 0.0105      |
| Corynebacterium | -0.693 (-2.359, 0.484) | 0.0012         | 0.0632      |
| Delftia         | 0 (-1.746, 0)          | 0.0031         | 0.1225      |
| Enhydrobacter   | 0 (-1.314, 0)          | 0.0065         | 0.187       |
| Cloacibacterium | -0.784 (-1.708, 0)     | 0.0071         | 0.187       |
| Polaromonas     | 0 (0, 0)               | 0.0103         | 0.214       |
| Peptoniphilus   | 0 (-1.314, 0)          | 0.0134         | 0.214       |
| Varibaculum     | 0 (0, 0)               | 0.0135         | 0.214       |
| Finegoldia      | 0 (-1.386, 0)          | 0.0142         | 0.214       |
| Staphylococcus  | -0.656 (-2.223, 0.444) | 0.0149         | 0.214       |
| Micrococcus     | 0 (-0.693, 0)          | 0.0175         | 0.2261      |
| Prevotella      | -0.347 (-1.365, 0)     | 0.0186         | 0.2261      |
| Variovorax      | 0 (0, 0)               | 0.0239         | 0.2697      |
| Coprobacter     | 0 (0, 0)               | 0.0316         | 0.3329      |
| Brevibacterium  | 0 (0, 0)               | 0.0343         | 0.3387      |
| Rhizobacter     | 0 (0, 0)               | 0.0411         | 0.3786      |
| Bergeyella      | 0 (0, 0)               | 0.0477         | 0.3786      |

Abbreviations: BH: q value of false discovery rate using Benjamin Hochberg 1995 method; IQR:

Interquartile Range

P<0.05 is statistically significant

**Table S2: Significant genera in tumors according to IHC status (linear model)**

| Genus            | Level    | Estimate | SE    | P-value | P        |
|------------------|----------|----------|-------|---------|----------|
| Exiguobacterium  | HR+HER2- | -0.366   | 0.1   | 0.0006  | 0.007    |
|                  | HR+HER2+ | -0.317   | 0.105 | 0.0041  |          |
|                  | TNBC     | -0.366   | 0.135 | 0.0092  |          |
| Rhodopseudomonas | HR+HER2- | -0.647   | 0.588 | 0.2773  | 0.0376   |
|                  | HR+HER2+ | 0.282    | 0.618 | 0.6509  |          |
|                  | TNBC     | -0.157   | 0.793 | 0.8444  |          |
| Varibaculum      | HR+HER2- | -0.561   | 0.162 | 0.0012  | 0.0086   |
|                  | HR+HER2+ | -0.597   | 0.171 | 0.001   |          |
|                  | TNBC     | -0.597   | 0.219 | 0.009   |          |
| Polaromonas      | HR+HER2- | 0        | 0.08  | 1       | 5.00E-04 |
|                  | HR+HER2+ | 0        | 0.084 | 1       |          |
|                  | TNBC     | 0.366    | 0.108 | 0.0014  |          |
| Aeromonas        | HR+HER2- | 0.023    | 0.151 | 0.8792  | 0.0047   |
|                  | HR+HER2+ | 0.099    | 0.159 | 0.536   |          |
|                  | TNBC     | 0.597    | 0.204 | 0.0053  |          |
| Romboutsia       | HR+HER2- | 0.116    | 0.218 | 0.5993  | 0.0226   |
|                  | HR+HER2+ | 0.05     | 0.229 | 0.8301  |          |
|                  | TNBC     | 0.768    | 0.294 | 0.0123  |          |
| Pedobacter       | HR+HER2- | 0.037    | 0.272 | 0.8934  | 0.0198   |
|                  | HR+HER2+ | 0.128    | 0.286 | 0.6562  |          |
|                  | TNBC     | 0.924    | 0.367 | 0.0152  |          |
| Leifsonia        | HR+HER2- | -0.67    | 0.163 | 0.0002  | 0.0016   |
|                  | HR+HER2+ | -0.693   | 0.172 | 0.0002  |          |
|                  | TNBC     | -0.693   | 0.22  | 0.0029  |          |
| Cupriavidus      | HR+HER2- | 0.046    | 0.145 | 0.7508  | 0.0086   |
|                  | HR+HER2+ | 0        | 0.152 | 1       |          |
|                  | TNBC     | 0.536    | 0.195 | 0.0085  |          |

NOTE: HR-HER2- tumors serve as the reference group

Abbreviations: SE: Standard Error; P&lt;0.05 is statistically significant

**Table S3: Significant genera in tumors according to PAM50 (linear model)**

| Genus           | Level      | Estimate | SE    | P-value | P        |
|-----------------|------------|----------|-------|---------|----------|
| Exiguobacterium | luminal A  | -0.022   | 0.055 | 0.6857  | 0.0097   |
|                 | HER2-E     | 0.344    | 0.1   | 0.0013  |          |
|                 | basal-like | -0.022   | 0.1   | 0.8248  |          |
| Bifidobacterium | luminal A  | 0.208    | 0.245 | 0.3998  | 0.0382   |
|                 | HER2-E     | -0.741   | 0.448 | 0.1049  |          |
|                 | basal-like | 1.007    | 0.448 | 0.0293  |          |
| Varibaculum     | luminal A  | -0.035   | 0.089 | 0.6911  | 0.0087   |
|                 | HER2-E     | 0.562    | 0.162 | 0.0012  |          |
|                 | basal-like | -0.035   | 0.162 | 0.828   |          |
| Polaromonas     | luminal A  | 0        | 0.044 | 1       | 5.00E-04 |
|                 | HER2-E     | 0        | 0.08  | 1       |          |
|                 | basal-like | 0.366    | 0.08  | 0       |          |
| Aeromonas       | luminal A  | -0.067   | 0.083 | 0.4214  | 0.0052   |
|                 | HER2-E     | -0.067   | 0.151 | 0.6596  |          |
|                 | basal-like | 0.53     | 0.151 | 0.001   |          |
| Romboutsia      | luminal A  | 0.093    | 0.119 | 0.4383  | 0.0198   |
|                 | HER2-E     | -0.067   | 0.217 | 0.759   |          |
|                 | basal-like | 0.7      | 0.217 | 0.0023  |          |
| Pedobacter      | luminal A  | 0.222    | 0.145 | 0.1329  | 0.0082   |
|                 | HER2-E     | 0        | 0.266 | 1       |          |
|                 | basal-like | 0.924    | 0.266 | 0.0011  |          |
| Leifsonia       | luminal A  | -0.022   | 0.089 | 0.8031  | 0.0016   |
|                 | HER2-E     | 0.671    | 0.163 | 0.0002  |          |
|                 | basal-like | -0.022   | 0.163 | 0.8916  |          |
| Cupriavidus     | luminal A  | 0.031    | 0.079 | 0.6973  | 0.0095   |
|                 | HER2-E     | -0.022   | 0.145 | 0.8779  |          |
|                 | basal-like | 0.514    | 0.145 | 0.0009  |          |

NOTE: Luminal B tumors serve as the reference group

Abbreviations: SE: Standard Error; P&lt;0.05 is statistically significant

**Table S4: Significant genera that differ between advanced vs early stage tumors**

| <b>Genus</b>     | <b>Estimate*</b> | <b>SE</b> | <b>P-value</b> |
|------------------|------------------|-----------|----------------|
| Stenotrophomonas | 1.51             | 0.597     | 0.0155         |
| Corynebacterium  | 1.122            | 0.554     | 0.0494         |
| Prevotella       | 1.11             | 0.475     | 0.0244         |
| Actinomyces      | 0.814            | 0.338     | 0.0207         |
| Streptococcus    | 0.668            | 0.317     | 0.0416         |
| Anaerococcus     | 0.618            | 0.303     | 0.0484         |
| Citrobacter      | 0.571            | 0.196     | 0.0059         |
| Dermacoccus      | 0.252            | 0.103     | 0.0192         |
| Blastococcus     | 0.194            | 0.086     | 0.0294         |

\*Estimate: Early staged tumors serve as the reference group

Abbreviations: SE: Standard Error; P<0.05 is statistically significant

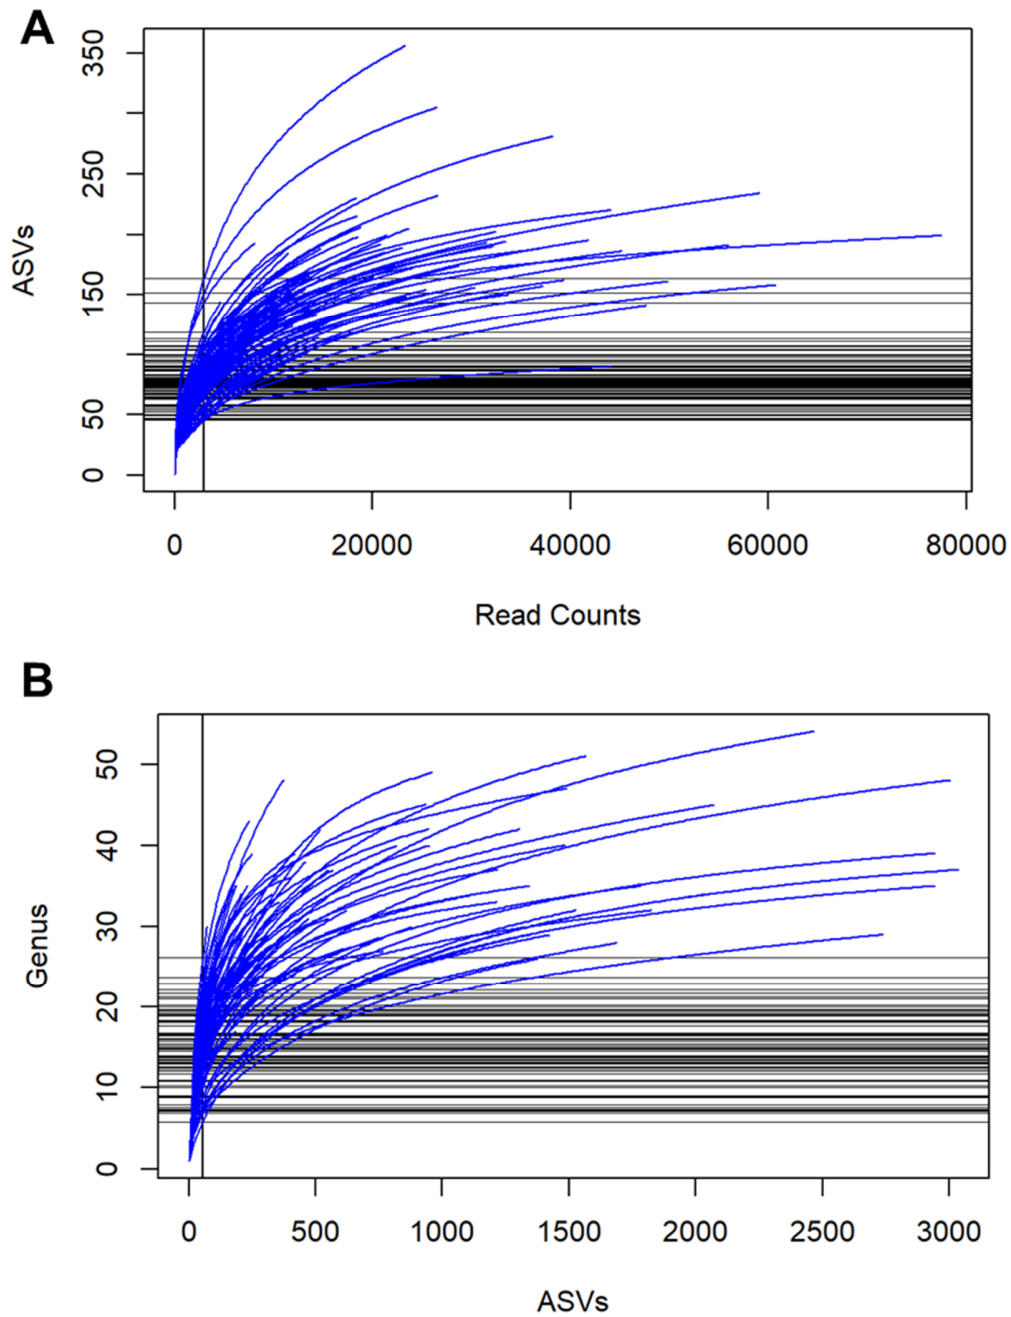

**Figure S1. Graphs show rarefaction curves from human breast tissue samples. (A)** Rarefaction curve relating the number of sequencing reads compared to the number of amplicon sequence variants (ASVs). **(B)** Rarefaction curve relating the number of ASVs compared to the number of microbial genera.

**A**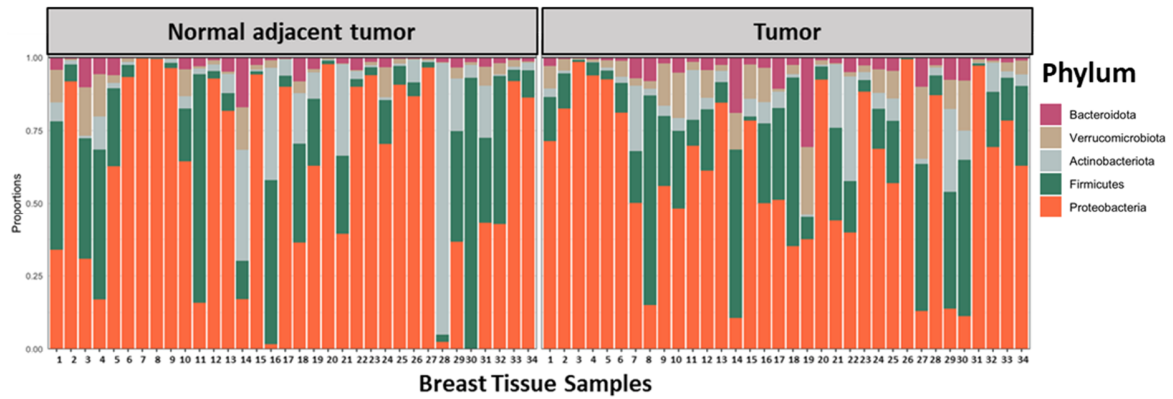**B**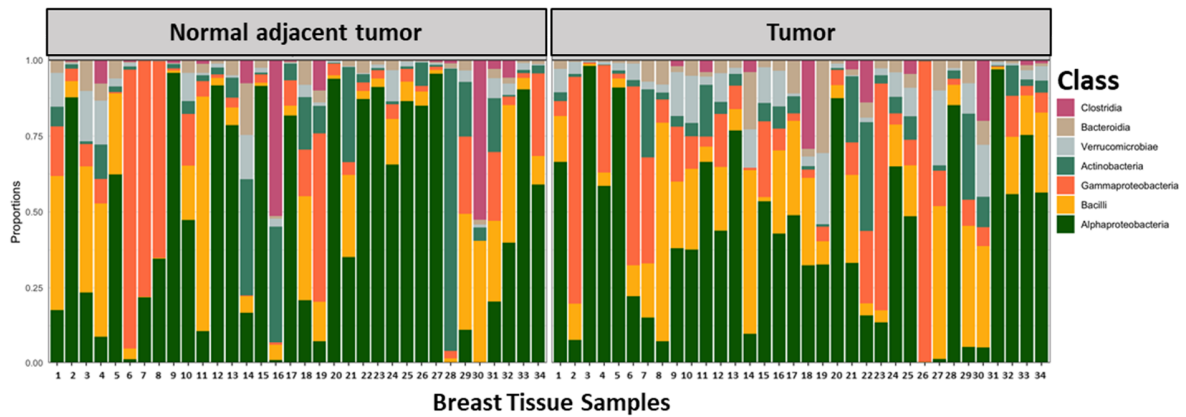**C**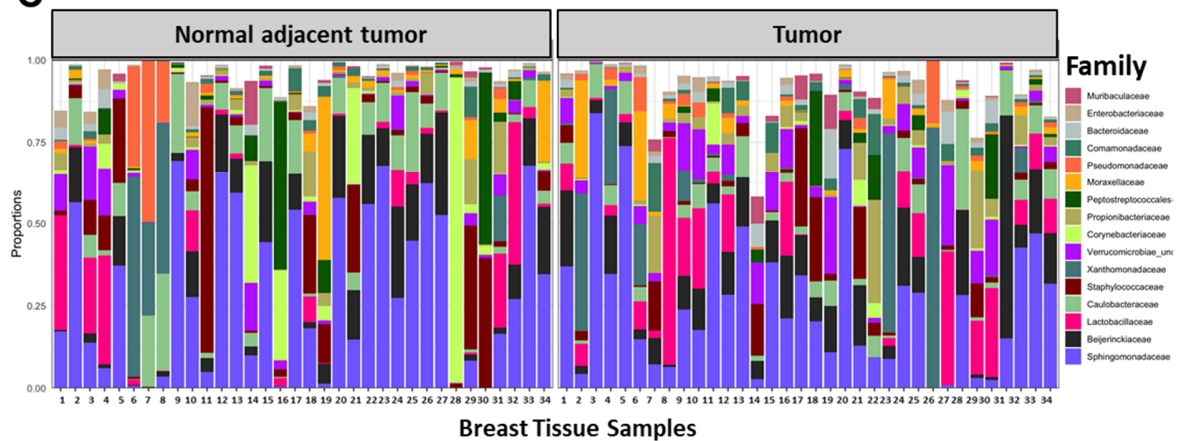

**Figure S2. Bar plots illustrating the relative abundances of microbiota that differ between NAT and breast tumor tissues by (A) phylum, (B) class, and (C) family taxonomic levels. The unfilled portion of the bar plots represent lower-abundance taxa.**
